# Supplementary material
Source: PubMed Central journal article supplement (PMC6600404)
Supplement: mic-164-338-s001.pdf [file mic-164-338-s001.pdf]

**Table S1. Oligonucleotides**

|                    |                                                                    |
|--------------------|--------------------------------------------------------------------|
| YscE-P1            | 5'-ACCTCGATGACACAATTAGAGGAGCAACTGCATAACGTGTGTGTAGGCTGGAGCTGCTTC-3' |
| YscE-P2            | 5'-TTTTAGGTCTCCTGCTACATAATGAATAATGGCTATAGCCATATGAATATCCTCCTTAGT-3' |
| YscE-CTL-F         | 5'-ATGCGGTGATTGTGAGTAAAGGAA-3'                                     |
| YscE-CTL-R         | 5'-GTCTGCTGGCTTCTTGAGCGTTG-3'                                      |
| YscI-SmaI-F        | 5'-TTTCCCGGGAAGAGGCGGTTCAATTGATTCGC-3'                             |
| YscI-R             | 5'-TATGTTGCGCATTTATGTATCCAT-3'                                     |
| YscI-F             | 5'-ATCGCCAAGACTGCCGGCGAATG-3'                                      |
| YscI-SmaI-R        | 5'-TTTCCCGGGAACGACAACAAGCCAATAAGATGC-3'                            |
| YscI-CTL-F         | 5'-GTTGGATTACCTTATTTATCAGAG-3'                                     |
| YscI-CTL-R         | 5'-TGGCTCTTTGTCTGCGGAAAGGCC-3'                                     |
| YscF-XbaI-F        | 5'-TTTTTCTAGACAGTTTGGCAGAGAGAATCTAAA-3'                            |
| YscF-HindIII-R     | 5'-TTTTAAGCTTTTATGGGAACCTCTGTAGGATGCC-3'                           |
| YscF-86-HindIII-R  | 5'-TTTTAAGCTTTCAGAACTTCTGTAGGATGCCTTGCAT-3'                        |
| YscF-85-HindIII-R  | 5'-TTTTAAGCTTTCACCTTCTGTAGGATGCCTTGCATTAA-3'                       |
| YscF-80-HindIII-R  | 5'-TTTTAAGCTTTCATTGCATTAAGTCTTTCATGCTACG-3'                        |
| YscF-1-R           | 5'-CATTATTTTAGGTCTCCTGTAC-3'                                       |
| YscF-6-F           | 5'-GGATTTACGAAAGGAACCGATATC-3'                                     |
| YscF-11-F          | 5'-ACCGATATCGCAGACTTAGATGCG-3'                                     |
| YscF-16-F          | 5'-TTAGATGCGGTGGCTCAAACGCTC-3'                                     |
| YscF-21-F          | 5'-CAAACGCTCAAGAAGCCAGCAGAC-3'                                     |
| YscG-HindIII-F     | 5'-TTTTAAGCTTAAATATAAACTCAACGTACTGTTA-3'                           |
| YscG-R             | 5'-GAGCCGTATGTTTTTAGTTGCTCCCT-3'                                   |
| YscE-F             | 5'-AATGGAGGTAAACCTCGATGACAC-3'                                     |
| YscE-6xHis-BglII-R | 5'-TTTAGATCTTCAATGATGATGATGATGATGAGAACCCCTTTTAGGTCTCCTGCTACATA-3'  |
| YscE-6xHis-KpnI    | 5'-TTTTGGTACCGGATCCTAGAATACAGACATTTGT-3'                           |
| YscE-6xHis-XbaI-R  | 5'-TTTTTCTAGAGACTATCTATCTAGATCTTCAATG-3'                           |
| YscE-234-F         | 5'-CCGCAGAGGAGCAACTGCATAACGTG-3'                                   |
| YscE-234-R         | 5'-CCGCCATCGAGGTTTACCTCCATTGAG-3'                                  |
| YscE-8910-F        | 5'-CCGCAGTGGAGACAGTGCCTCTATC-3'                                    |
| YscE-8910-R        | 5'-CCGCTTGCTCCTCTAATTGTGTCAT-3'                                    |
| YscE-1112-F        | 5'-GCTACAGTGCCTCTATCACCATG-3'                                      |
| YscE-1112-R        | 5'-TGCGTTATGCAGTTGCTCCTCTAA -3'                                    |

YscE-1314-F 5'-GCTCGCTCTATCACCATGCAACTA-3'  
YscE-1314-R 5'-TGCCTCCACGTTATGCAGTTGCTC-3'  
YscE-1516-F 5'-GCTATCACCATGCAACTAGAAATG-3'  
YscE-1516-R 5'-TGCCACTGTCTCCACGTTATGCAG-3'  
YscE-1920-F 5'-GCTCTAGAAATGGCACTAACTAAG-3'  
YscE-1920-R 5'-TGCGGTGATAGAGCGCACTGTCTC-3'  
YscE-2223-F 5'-GCTGCACTAACTAAGCTCAAAAAA-3'  
YscE-2223-R 5'-TGCTAGTTGCATGGTATAGAGCG-3'  
YscE-2627-F 5'-GCTCTCAAAAAAGATATGATGCGCGG-3'  
YscE-2627-R 5'-TGCTAGTGCCATTTCTAGTTGCAT-3'  
YscE-3031-F 5'-GCTATGATGCGCGGTGGTATGCC-3'  
YscE-3031-R 5'-TGCTTTGAGCTTAGTTAGTGCCAT-3'  
YscE-323334-F 5'-CCGCAGGTGGTATGCCAAGCAGTAT-3'  
YscE-323334-R 5'-CCGCATCTTTTTGAGCTTAGTTAG-3'  
YscE-353637-F 5'-ACAAGGCCAAGCAGTATCAGGTTTGG-3'  
YscE-353637-R 5'-GCTTGCGCATCATATCTTTTTGAGC-3'  
YscE-3940-F 5'-GCTTATCAGGTTTGGCAGAGAGAA-3'  
YscE-3940-R 5'-TGCGGCATCACCACCGCGCATCAT-3'  
YscE-4243-F 5'-GCTTGGCAGAGAGAATCTAAAGCT-3'  
YscE-4243-R 5'-TGCATACTGCTTGGCATCACCACC-3'  
YscE-50515354-F 5'-CGACGCATAGCCATTATTCATTATGTAGCAG-3'  
YscE-50515354-R 5'-TTCCTTCTTTTTAGATTCTCTCTGCCAAAC-3'  
YscE-6465-F 5'-GCTAAAGGGGGTTCTCATCATCAT-3'  
YscE-6465-R 5'-TGCTCCTGCTACATAATGAATAAT-3'  
SSSSSS-F 5'-AGTTCGAGTAAAGGAACCGATATCGCAGACTTA-3'  
SSSSSS-R 5'-CGAACTCGAACTCATTTATTTTAGGTCTCCTGC-3'  
ISSISI-F 5'-ATTAGTATCAAAGGAACCGATATCGCAGACTTA-3'  
ISSISI-R 5'-CGAACTAATACTCATTTATTTTAGGTCTCCTGC-3'  
IIIIII-F 5'-ATCATTATCAAAGGAACCGATATCGCAGACTTA-3'  
IIIIII-R 5'-AATGATAATACTCATTTATTTTAGGTCTCCTGC-3'  
SIISSI-F 5'-AGTTCGATTAAAGGAACCGATATCGCAGACTTA-3'  
SIISSI-R 5'-AATGATCGAACTCATTTATTTTAGGTCTCCTGC-3'  
YscF-KpnI-F 5'-TTTGGTACCCAGGTTTGGCAGAGAGAATCTAAAG-3'  
YscF-1-R 5'-TTTGAATTCCATTTATTTTAGGTCTCCTGCTAC-3'

YscF-3-R 5'-TTTGAATTCGTTACTCATTATTTTAGGTCTCC-3'  
YscF-6-R 5'-TTTGAATTCCTCCAGAGAAGTTACTCATTATTTTAG-3'  
YscF-9-R 5'-TTTGAATTCCTTCGTAAATCCAGAGAAGTTACTC-3'  
YscF-12-R 5'-TTTGAATTCATCGGTTCTTCGTAAATCCAGAG-3'  
YscF-15-R 5'-TTTGAATTCGTCTGCGATATCGGTTCTTCGT-3'  
YscF-20-R 5'-TTTGAATTCAGCCACCGCATCTAAGTCTGCGAT-3'  
YscF-30-R 5'-TTTGAATTCGCATCGTCTGCTGGCTTCTTGAG-3'  
YscF-40-R 5'-TTTGAATTCGTCTGCTATCGAGTCATTAACCGC -3'  
YscF-50-R 5'-TTTGAATCTAGCGCCGGTTGTCAGGCTTATC -3'  
YopM-30-F 5'-GAAAATGTTAAATCTAAGACTGAA-3'  
YopM-STOP-HindIII-R 5'-TTTAAGCTTCTACTCAAATACATCATCTTCAAG -3'

**Table S2. YscE-6xHis mutants**

| <u>YscE-6xHis mutant #</u> | <u>YscE-6xHis mutant</u>         |
|----------------------------|----------------------------------|
| 1                          | YscE-6xHis (T2A Q3A L4A)         |
| 2                          | YscE-6xHis (E5A E6A K7A)         |
| 3                          | YscE-6xHis (V11A E12A)           |
| 4                          | YscE-6xHis (T13A V14A)           |
| 5                          | YscE-6xHis (R15A S16A)           |
| 6                          | YscE-6xHis (M19A Q20A)           |
| 7                          | YscE-6xHis (E22A M23A)           |
| 8                          | YscE-6xHis (T26A K27A)           |
| 9                          | YscE-6xHis (K30A D31A)           |
| 10                         | YscE-6xHis (M32A M33A R34A)      |
| 11                         | YscE-6xHis (G35K G36H D37K)      |
| 12                         | YscE-6xHis (K39A, Q40A)          |
| 13                         | YscE-6xHis (Q42A V43A)           |
| 14                         | YscE-6xHis (A50K L51K S53R A54R) |
| 15                         | YscE-6xHis (D64A L65A)           |

**Fig. S1. Functional analysis of YscE-6xHis point mutants.**

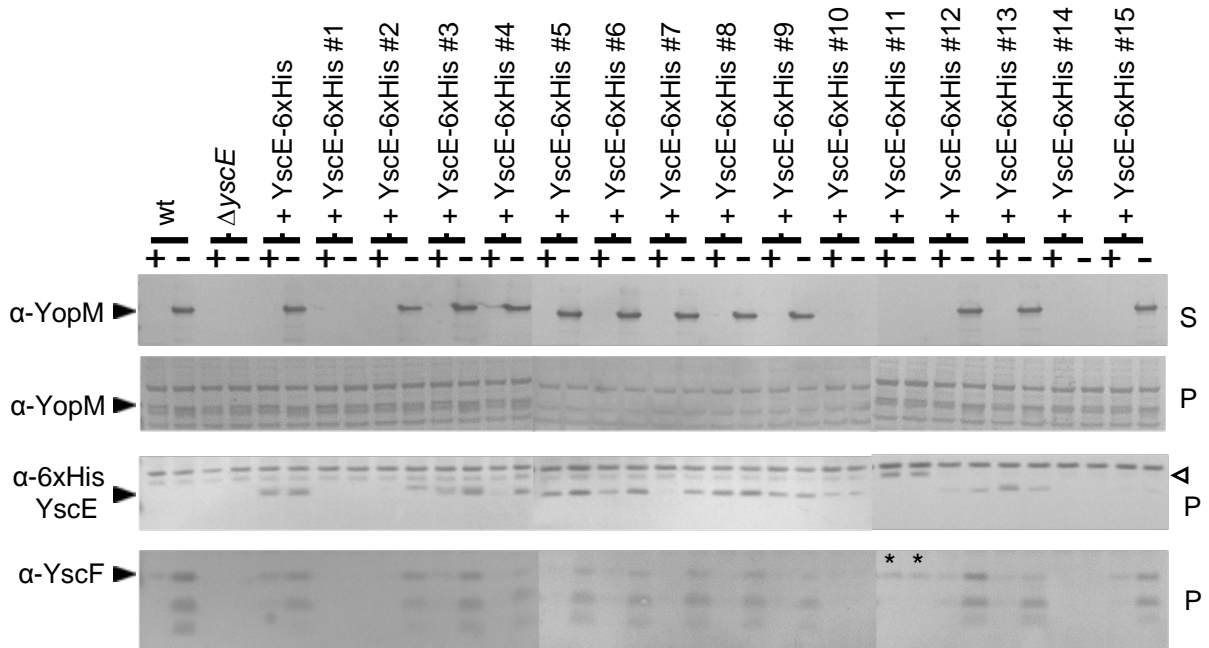

*Y. pestis* KIM5-3001, an isogenic  $\Delta yscE$  mutant and the  $\Delta yscE$  mutant carrying plasmid pYscE-6xHis or derivatives of this plasmid expressing YscE-6xHis point mutants (Table S2) were grown in the presence (+) or absence (-) of 2.5 mM  $CaCl_2$  and cell pellets and culture supernatants were analyzed by SDS-PAGE and immunoblot analysis with antibodies specific for YopM YscF and penta-His (YscE) (closed arrowheads). The YscF stabilized by YscE-6xHis (G35K G36H D37K) is marked by asterisks. The location of the YscE-6xHis (G35K G36H D37K) protein is marked by an open arrowhead.
